# Supplementary material for: The FANCD2–FANCI complex is recruited to DNA interstrand crosslinks before monoubiquitination of FANCD2
Source: PubMed Central journal article supplement (PMC4947157; doi:10.1038/ncomms12124), 2016-07-13
Supplement: ncomms12124-s1.pdf [file ncomms12124-s1.pdf]

## Supplementary Figure 1

a

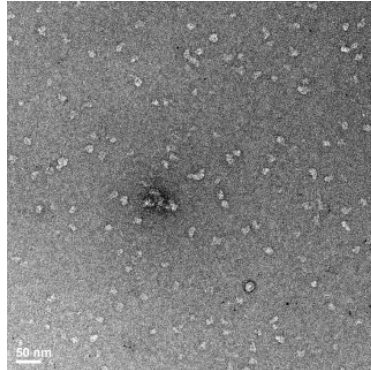

b

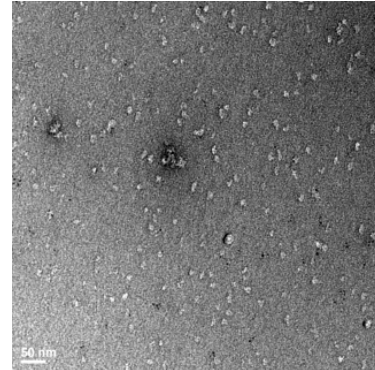

**Supplementary Figure 1. Representative micrographs showed homogeneity of the sample.** A) Micrograph of negative staining EM full-length FANCD2-FANCI complex 0° tilt. B) Tilted micrograph (50° tilt) of the same area as in (A).

## Supplementary Figure 2

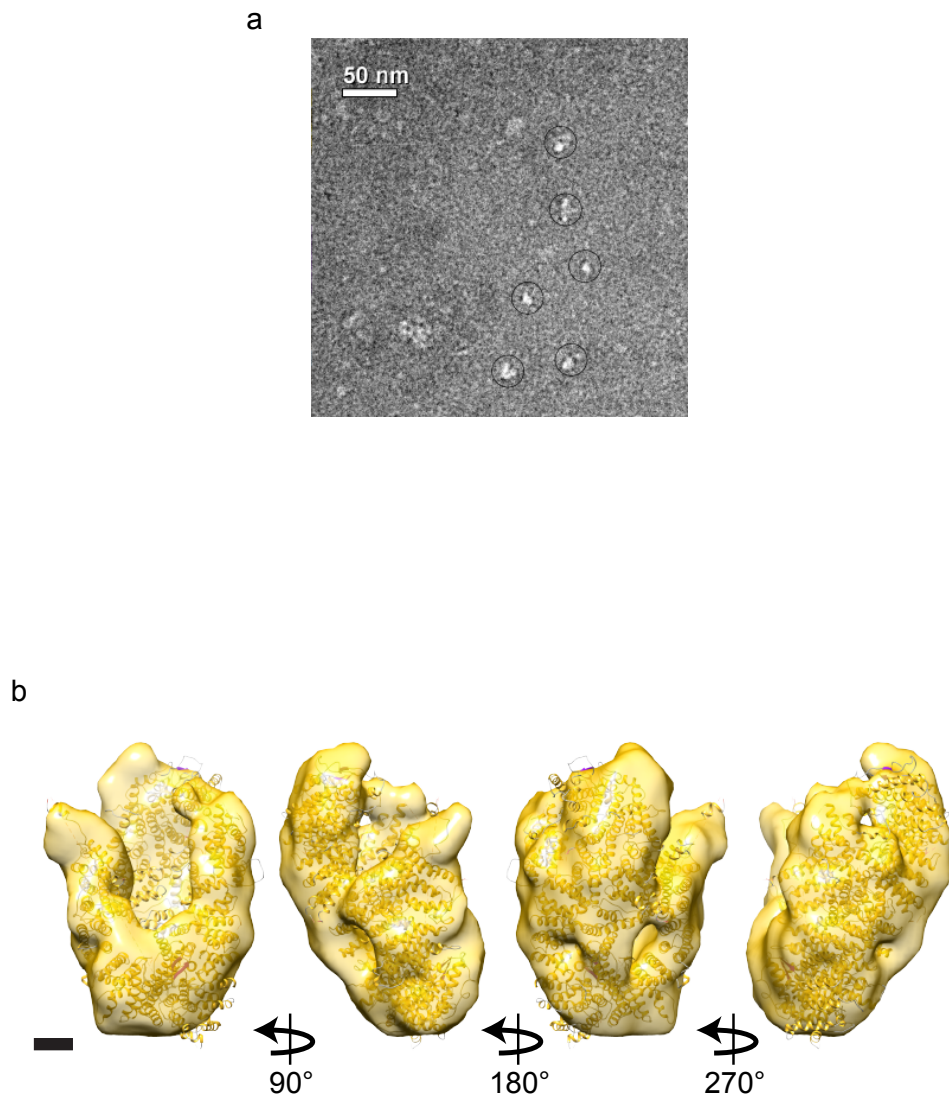

**Supplementary Figure 2. Comparison of the human FANCD2- $\Delta$ Tower-FANCI complex and the mouse complex.** A) Micrograph of Cryo-EM of full-length FANCD2-FANCI complex. B) Different orientations of Cryo-EM density map of FANCD2- $\Delta$ Tower-FANCI complex docked with the mouse FANCD2-FANCI crystal structure deleting amino acids 1144 – 1450 (PDB: 3S4W). Scale bar, 20 Å.

### Supplementary Figure 3

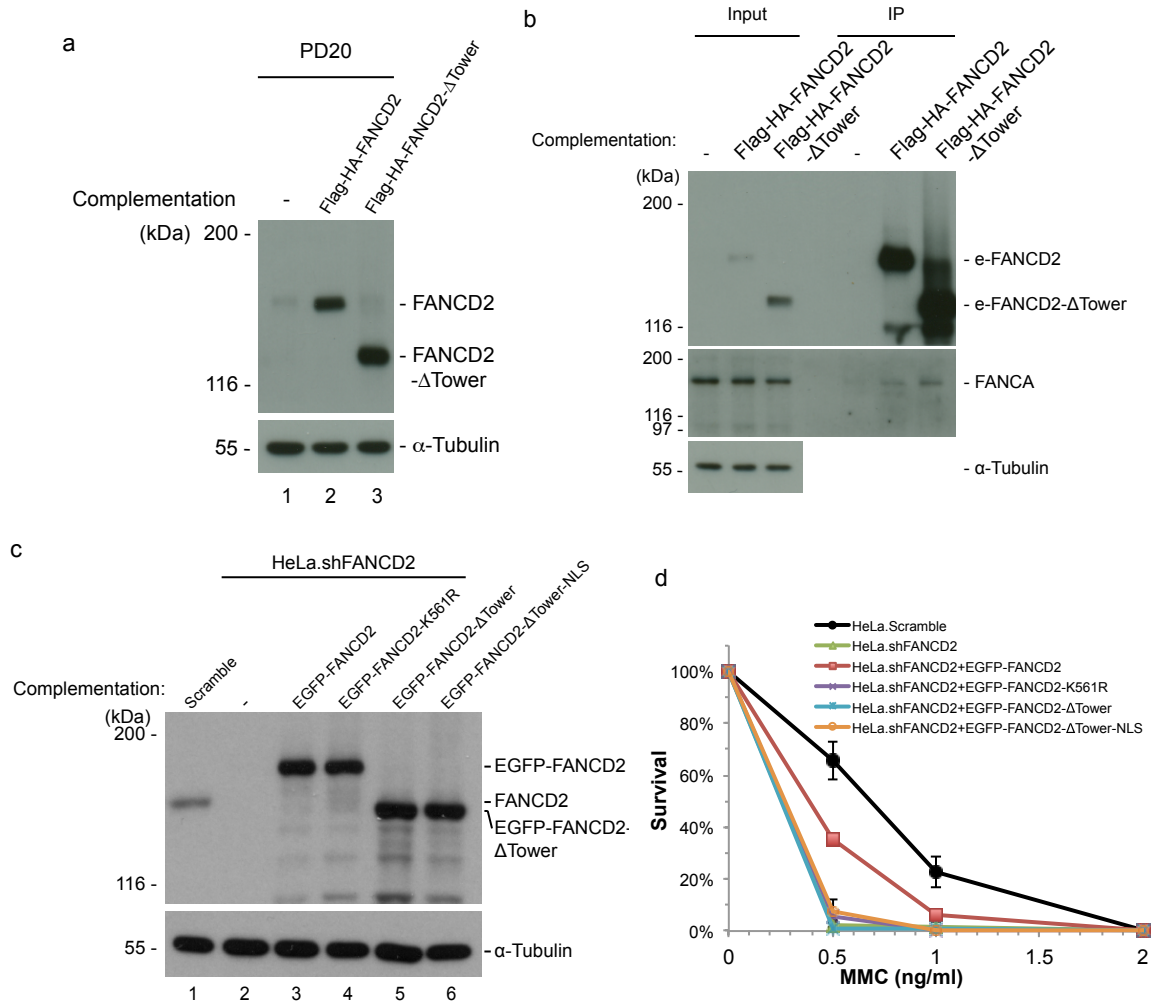

**Supplementary Figure 3. The Tower domain of FANCD2 is functionally important but dispensable for the interaction with the FA core complex.** A) Western blot analysis of PD20 cells complemented with Flag-HA-FANCD2 and Flag-HA-FANCD2- $\Delta$ Tower used in Figure 3A showing the expression level of FANCD2. B) Immunoprecipitation of Flag-HA-FANCD2 and Flag-HA-FANCD2- $\Delta$ Tower from PD20 cells, immunoblotting against FANCD2 and FANCA (component of the FA core complex). PD20 without complementation was used as a negative control. Cells were treated overnight with 160ng/ml MMC. C) Western blotting of the HeLa.Scramble, HeLa.shFANCD2 and HeLa.shFANCD2 complemented with EGFP tagged wild type, K561R,  $\Delta$ Tower and  $\Delta$ Tower-NLS FANCD2 used in Figure S3D showing the expression level of FANCD2. D) Clonogenic survival assay of HeLa.Scramble, HeLa.shFANCD2 and HeLa.shFANCD2 complemented with EGFP tagged wild type, K561R,  $\Delta$ Tower and  $\Delta$ Tower-NLS FANCD2. The experiment was done in triplicate. Error bars show SD.

## Supplementary Figure 4

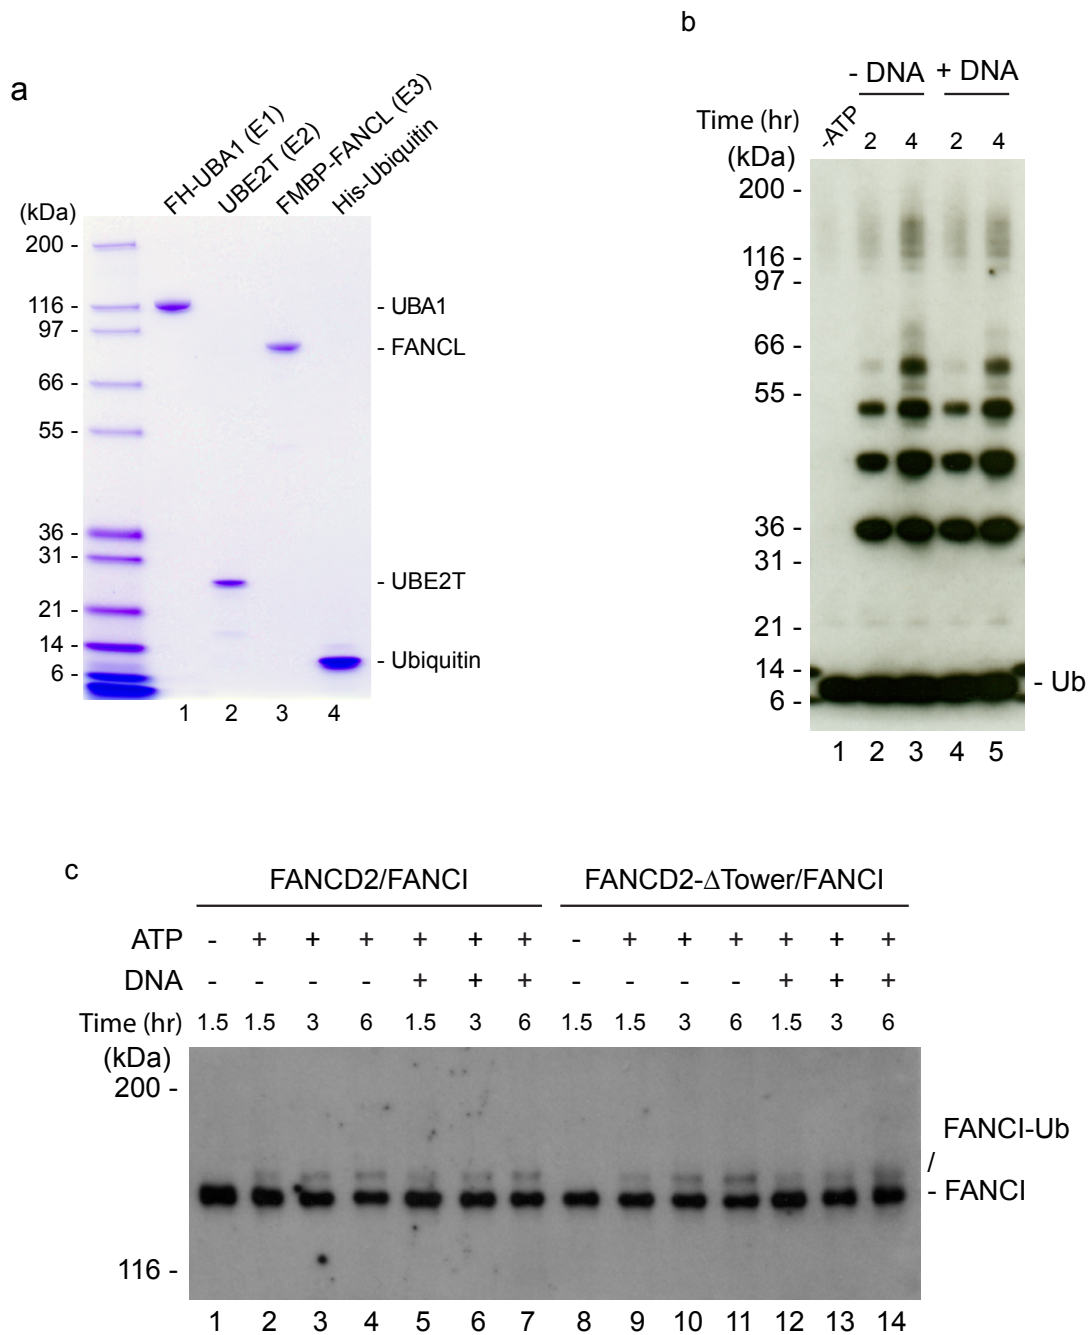

**Supplementary Figure 4. The Tower domain of FANCD2 is important for monoubiquitination of FANCD2.** A) Coomassie blue stain of purified recombinant FLAG-HA-UBA1 (E1), UBE2T (E2), FLAG-MBP-FANCL (E3) and 6xHis-ubiquitin. B) *In vitro* ubiquitination assay of full-length FANCD2-FANCI complex. Immunoblot using antibodies against Ubiquitin. C) *In vitro* ubiquitination assay of full-length FANCD2-FANCI complex. Immunoblot using antibodies against FANCI.

## Supplementary Figure 5

**a**

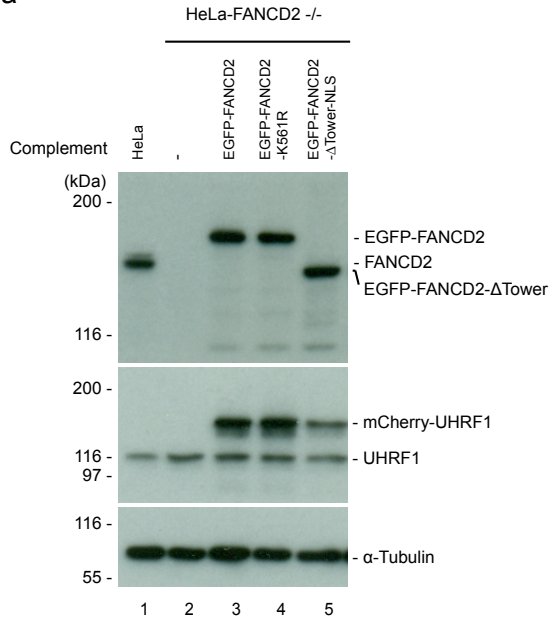

**c**

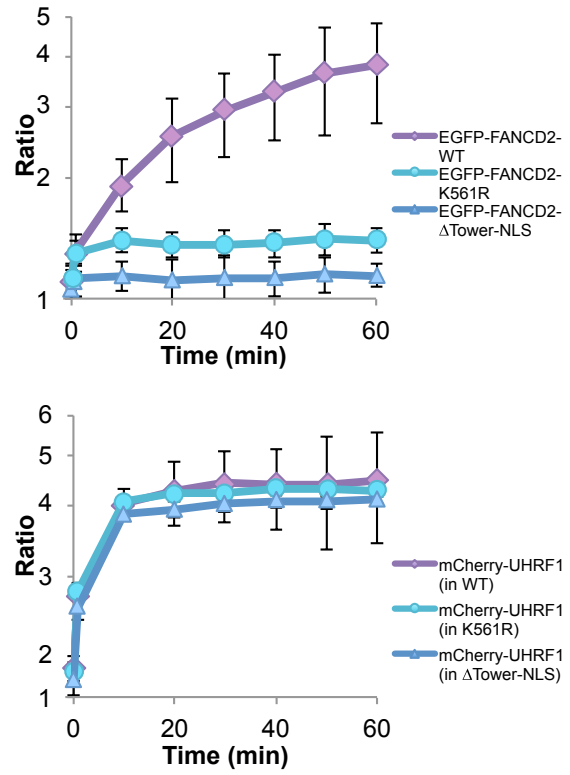

**b**

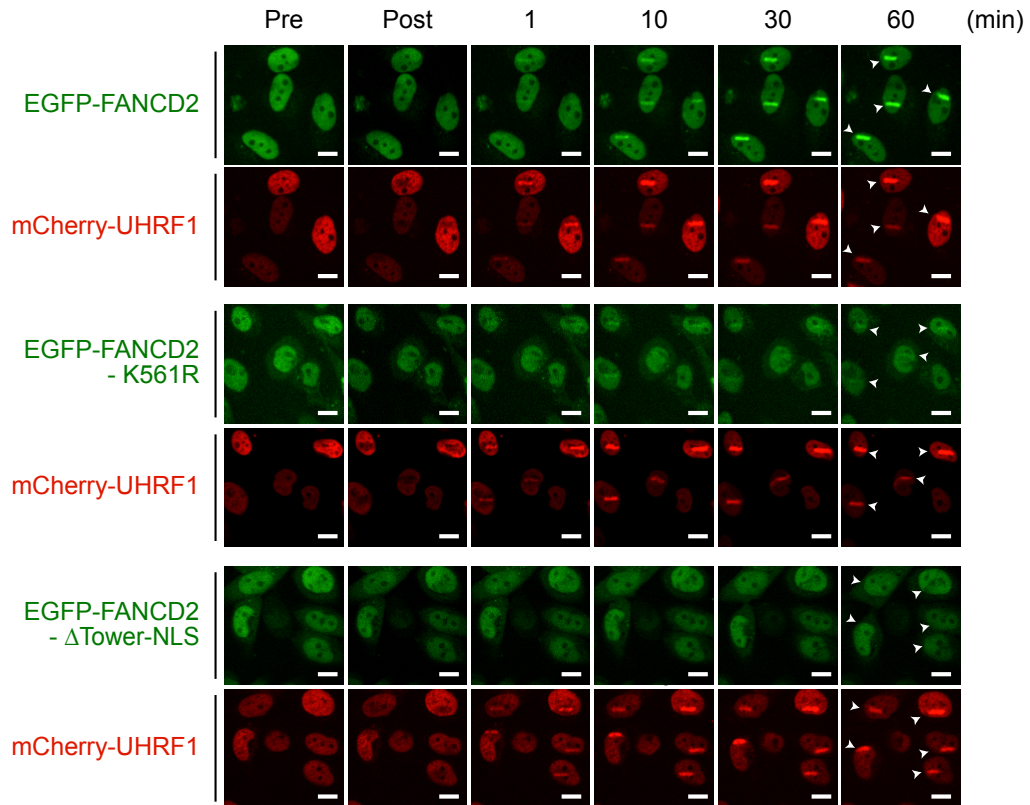

**Supplementary Figure 5. FANCD2 recruitment to DNA through the Tower domain precedes its monoubiquitination on lysine 561.** A) Western blot analysis of HeLa-FANCD2  $-/-$  complemented with mCherry-UHRF1 and EGFP-tagged wild type, K561R and  $\Delta$ Tower-NLS FANCD2 used in Figure S5B showing the expression level of UHRF1 and FANCD2. B) HeLa-FANCD2  $-/-$  cells expressing EGFP-tagged wild type, K561R and  $\Delta$ Tower-NLS FANCD2 were pre-treated with TMP, and micro-irradiated at the indicated areas (white arrows). mCherry-UHRF1 was co-expressed in all three cell lines and used as positive controls for the introduction of ICLs. Wild type EGFP-FANCD2 was recruited to ICLs rapidly and strongly, EGFP-FANCD2-K561R was recruited rapidly and weakly, while no recruitment of EGFP-FANCD2- $\Delta$ Tower-NLS was observed. Representative fields shown. C) Quantification of the fluorophore-tagged proteins recruited to ICLs at the irradiated sites (8, 11 and 10 cells were quantified for EGFP-FANCD2, EGFP-FANCD2-K561R and EGFP-FANCD2- $\Delta$ Tower-NLS, respectively). Scale bar: 20 $\mu$ m. Error bars show SD.

### Supplementary Figure 6

**a**

|                  |                                                              | R1236 | K1247   |           |
|------------------|--------------------------------------------------------------|-------|---------|-----------|
|                  |                                                              | ↓     | ↓       |           |
| gi   Homo        | LINSPK-DASSSTFPPLTRHTFVFFRVMMAELEKTVKKIEPQT-AADSQQIHEEKLLYW  |       |         | 1268      |
| gi   Pan         | LINSPK-DASSSTFPPLTRHTFVFFRVMMAELEKTVKKIEPQT-AADSQQIHEEKLLYW  |       |         | 1286      |
| gi   Macaca      | LINSPK-DVSSSTFPPLTRHTFVFFRVMMAELEKTVKKIEPQT-AADSQQIHEEKLLYW  |       |         | 1198      |
| gi   Sus         | LINSPTKDASSSTFPPLTRHTFVFFRVMMAELEKTVKGLQVAT-AADSQQIHEEKLLYW  |       |         | 1268      |
| gi   Loxodonta   | LINSPK-DASSSTFPPLTRHTFVFFRVMMAELEKTVKGLQAGT-ATDQQQVHEEKLLYW  |       |         | 1268      |
| gi   Mus         | LVSAPK-DASSSTFPPLTRHTFVFFRVMMAELEKTVKGLQAGT-AADSQQVHEEKLLYW  |       |         | 1266      |
| gi   Monodelphis | LIQSSK-DASSSFPTLTRQTFVFFRVMMAELEKSVRSLOAGT-AADLPKVHEEKLLYW   |       |         | 1270      |
| gi   Rattus      | LVNAPK-DASSSTFPPLTRHTFVFFRVMMAELEKTVKGLQAGT-ATDSQQVHEEKLLYW  |       |         | 1271      |
| gi   Bos         | LINSPK-EASSSTFPPLTWTFVFFRVMMAELEKTVKGLQAGT-AADSQQIHEEKLLYW   |       |         | 1282      |
| gi   Equus       | LINSPK-DASSSTFPPLTRHTFVFFRVMMAELEKTVKGLQAGT-AADSQQIHEEKLLYW  |       |         | 1266      |
| gi   Canis       | LINSPK-DASSMFPPLTRQSFVFFRVMMAELEKTVKGLQAGT-AADSQQIHEEKLLYW   |       |         | 1265      |
| gi   Ailuropoda  | LINSPK-DASSSTFPPLTRHTFVFFRVMMAELEKTVKGLQAGT-AADAQVIHEEKLLYW  |       |         | 1268      |
| gi   Meleagris   | LINCAK-DGCSSTYPTLSRQTFPFVFRVMMAELEKTVKGLQAGT-PSDSSEVQLEKLLKW |       |         | 1265      |
| gi   Gallus      | LINSAK-DGCSSTYPTLSRQTFPFVFRVMMAELEKTVKGLQAGT-PSDSSEVQLEKLLKW |       |         | 1268      |
| gi   Drosophila  | ILNT-K-DKALTSFPNFKKANFPLFRGLCEVLHLSLGSQVS-----VDSRGDKLKLW    |       |         | 1287      |
| gi   Bombyx      | LLES-K-NDTLRGLKCKINKNVNFPIFRNLGTAVFE-----AAKRRLDKGMTNAEHLVLW |       |         | 1165      |
| gi   Anolis      | LINSK-DGYSSTYPTLTRQTFPIFRVMMTQLESSIKSISPGTASSDTRVQLEKLLQW    |       |         | 1312      |
| gi   Xenopus     | LVNAAK-DAASSSYPTLTRQTFVFFRVMMDKLEKCVKSIPNSK-KAETLQEQTEQLLSW  |       |         | 1261      |
| gi   Danio       | LLNAAK-DANSRSWPLNRTFLVYKCMMSSELEKAVRKIPPSK-QMDNQEMQSEKLLTW   |       |         | 1270      |
|                  | ::: . . :                                                    | . . * | : : : : | : . : : * |

**b**

|                  |                                                              | K1296 | K1299 | K1307 |      |
|------------------|--------------------------------------------------------------|-------|-------|-------|------|
|                  |                                                              | ↓     | ↓     | ↓     |      |
| gi   Homo        | NMAVRDFSILINLIKVFDSHPVLHVCLKYGRLFVEAFKQCMPLLDFFSRKHKREDVLSLL |       |       |       | 1328 |
| gi   Pan         | NMAVRDFSILINLIKVFDSHPVLHVCLKYGRLFVEAFKQCMPLLDFFSRKHKREDVLSLL |       |       |       | 1346 |
| gi   Macaca      | NMAVRDFSILINLIKVFDSHPVLHVCLKYGRLFVEAFKQCMPLLDFFSRKHKREDVLSLL |       |       |       | 1258 |
| gi   Sus         | NMAVRDFSILINLIKVFDSHPVLHVCLKYGRLFVEAFKQCMPLLDFFSRKHKREDVLSLL |       |       |       | 1328 |
| gi   Loxodonta   | NMAVRDFSILLNLIKVFDSHPVLHVCLKYGRLFVEAFKQCMPLLDFFSRKHKREDVLSLL |       |       |       | 1328 |
| gi   Mus         | NMAVRDFSILLNLKVFDSYVPLHVCLKYGRRFVEAFKQCMPLLDFFSRKHKREDVLSLL  |       |       |       | 1326 |
| gi   Monodelphis | SMAVRDFNLLINLVKVFDSRPVLNCLKYGRLFVETFLKQCMPLLDFFSRKHKREDVLSLL |       |       |       | 1330 |
| gi   Rattus      | NMAVRDFSILINLMKVFDSYVPLHVCLKYGRRFVEAFKQCMPLLDFFSRKHKREDVLSLL |       |       |       | 1331 |
| gi   Bos         | NMAVRDFSILINLIKVFDSRPVLFACLKYGRLFVEAFKQCMPLLDFFSRKHKREDVLSLL |       |       |       | 1342 |
| gi   Equus       | NMAVRDFSILINLIKVFDSRPVLHVCLKYGRLFVEAFKQCMPLLDFFSRKHKREDVLSLL |       |       |       | 1326 |
| gi   Canis       | NMAVRDFSILINLIKVFDSRPVLHVCLKYGRLFVEAFKQCMPLLDFFSRKHKREDVLSLL |       |       |       | 1325 |
| gi   Ailuropoda  | NMAVRDFSILINLIKVFDSRPVLHVCLKYGRLFVEAFKQCMPLLDFFSRKHKREDVLSLL |       |       |       | 1328 |
| gi   Meleagris   | NIAVRNFHILINLVKVFDSRPVLSICLKYGRLFVEAFKHAMPLLDHSPFKKHRDDVQSL  |       |       |       | 1325 |
| gi   Gallus      | NIAVRNFHILINLVKVFDSRPVLSICLKYGRLFVEAFKHAMPLLDHSPFKKHRDDVQSL  |       |       |       | 1328 |
| gi   Drosophila  | ESAVDLLNGLLSIVQQVEQPRNFGFLKHSLLFLKLLQHGMSALESIVREDPERLTRFL   |       |       |       | 1347 |
| gi   Bombyx      | RDIADILKSMTEIVKTQKSN-SLTAFKNSMPLRLRFLTLQIPILKLEPKNQDEVLIQIL  |       |       |       | 1224 |
| gi   Anolis      | NMAVRDFHILVNLVKVFDSRPVLSVCLKYGRLFVETFLKHGMPLLDYSFKKHKREDVQSL |       |       |       | 1372 |
| gi   Xenopus     | NLAVRDFHILVNLVKVFDSRPVLSICLKYGRLFVETFLKLGMPPLDCCFKKQREDVQSL  |       |       |       | 1321 |
| gi   Danio       | NLAVRDFHILINLVKMFDSRPVLTCLKYGRLFVLESFLKLGMPPLDYSFKKHKEDVQGLL |       |       |       | 1330 |
|                  | . : : : : : . . : : * . : : : : : * . : : : : : : *          |       |       |       |      |

**c**

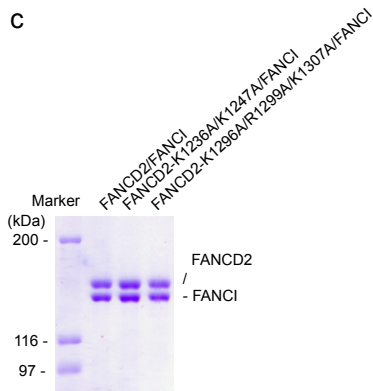

**d**

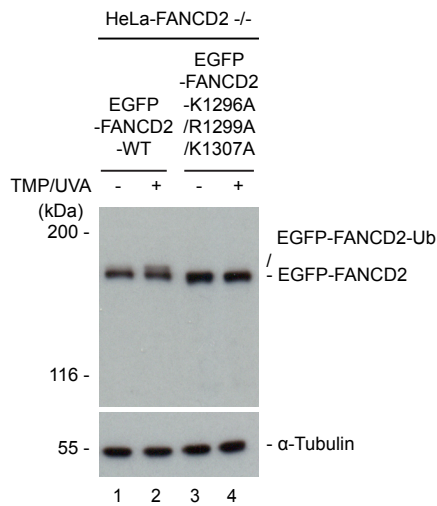

**Supplementary Figure 6. Residues K1296, R1299 and K1307 of the Tower domain of FANCD2 are highly conserved and critical for the *in vivo* ubiquitination of FANCD2.** A) Sequence alignment of the C-terminal region of FANCD2 showing the conservation of the positive residues, R1236 and K1247 in the Tower domain. B) Sequence alignment of the C-terminal region of FANCD2 showing the conservation of the positive residues, K1296, R1299 and K1307, in the Tower domain. C) Coomassie blue stain of purified recombinant wild type, R1236A/K1247A and K1296A/R1299A/K1307A FANCD2-FANCI complex. D) HeLa-FANCD2 *-/-* cells complemented with EGFP-FANCD2 and EGFP-FANCD2 K1296A/R1299A/K1307A were treated with 500ng TMP, irradiated with 250J/m<sup>2</sup>, 365nm UVA. Cells were harvested after 6 hours followed by whole cell lysis and immunoblotting using the indicated antibodies.



**Supplementary Figure 7**

**Figure 3b**

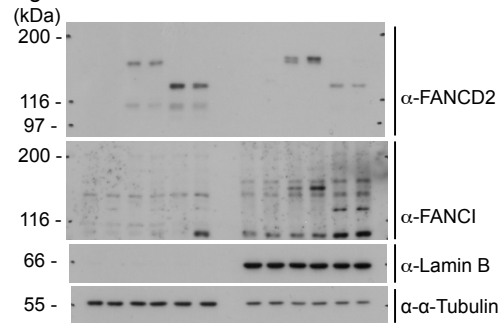

**Figure 4d**

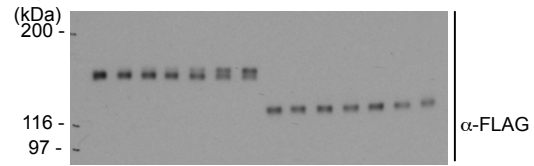

**Supplementary Figure 3a**

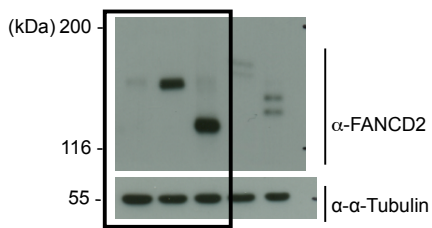

**Supplementary Figure 3b**

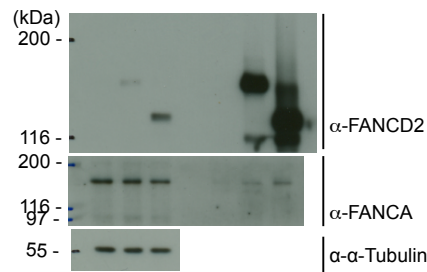

**Supplementary Figure 3c**

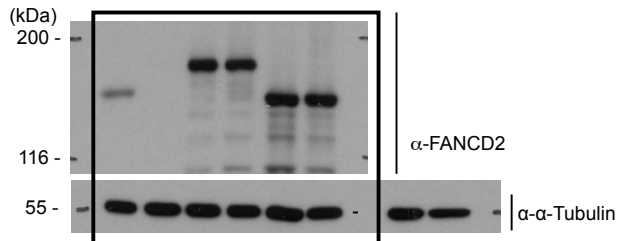

**Supplementary Figure 4b**

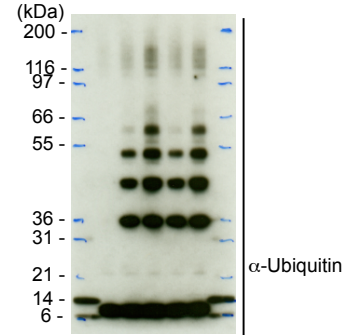

**Supplementary Figure 4c**

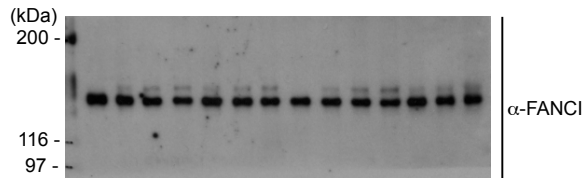

**Supplementary Figure 5a**

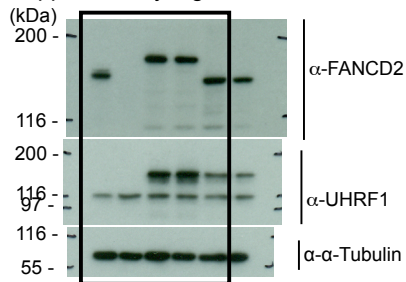

**Supplementary Figure 6d**

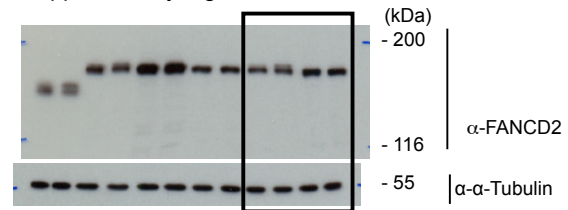

**Supplementary Figure 7. Uncropped original images of immunoblotting results.**
