# Supplementary material for: The FANCD2–FANCI complex is recruited to DNA interstrand crosslinks before monoubiquitination of FANCD2
Source: PubMed Central journal article supplement (PMC4947157; doi:10.1038/ncomms12124), 2016-07-13
Supplement: ncomms12124-s2.pdf [file ncomms12124-s2.pdf]

**Editorial Note:** this manuscript has been previously reviewed at another journal that is not operating a transparent peer review scheme. This document only contains reviewer comments and rebuttal letters for versions considered at Nature Communications.
